# Supplementary material
Source: PubMed Central journal article supplement (PMC5627671)

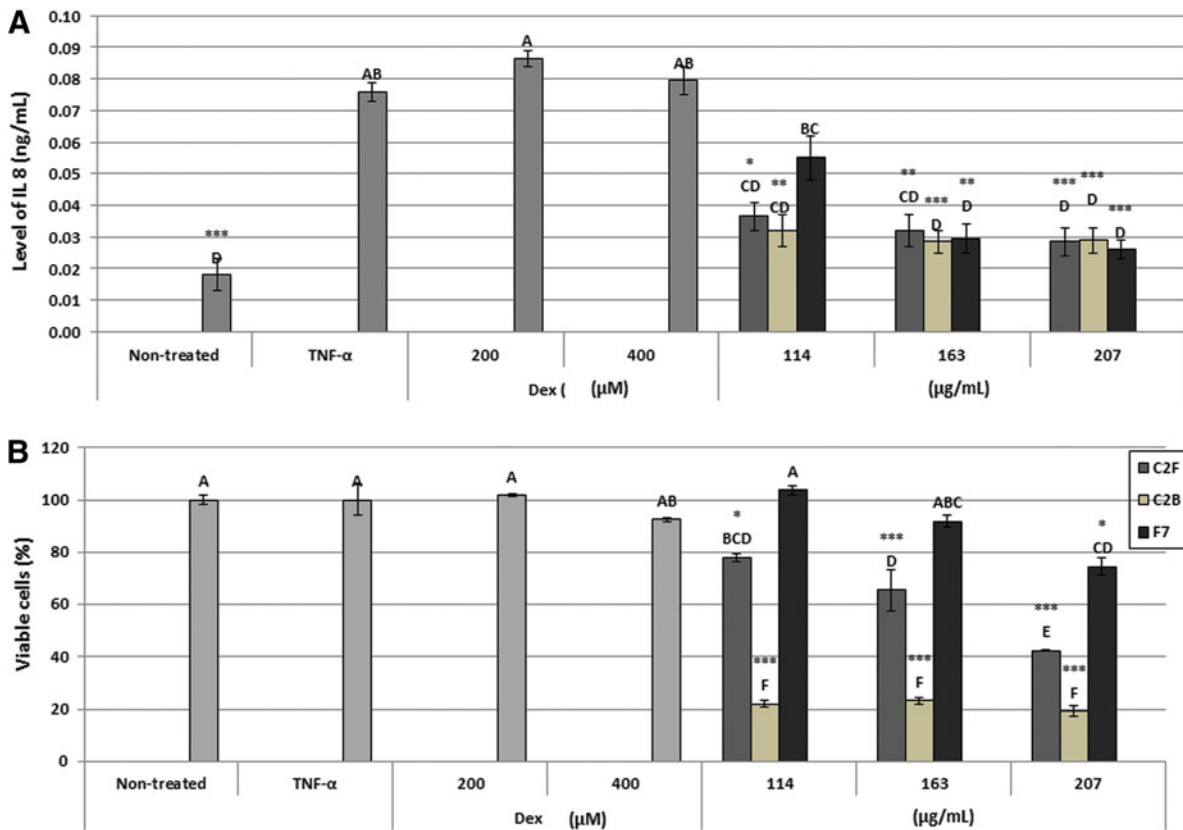

**SUPPLEMENTARY FIG. S2. (A)** Anti-inflammatory activity at different concentrations of *C. sativa* ethanolic fresh flower extracts (C2F; 114–207  $\mu$ g/mL), baked flower extracts (C2B; 114–207  $\mu$ g/mL), F7 from fresh flower extracts (an HPLC fraction of C2F at concentrations of 114–207  $\mu$ g/mL), and Dex at 200 and 400  $\mu$ M on CaCO<sub>2</sub> cells measured as level of IL-8 (ng/mL). CaCO<sub>2</sub> were seeded (50,000 per well) in triplicate in 500  $\mu$ L growing media and incubated for 24 h at 37°C in a humidified 5% CO<sub>2</sub>–95% air atmosphere. Cells were treated with 300 ng/mL TNF $\alpha$  and 50  $\mu$ L of *C. sativa* ethanol extract of C2F or fractions for 4 h. Nontreated are the cells without TNF $\alpha$  and treatments. Levels of IL-8 were measured from the supernatant using a commercial kit. Values (ng/mL) were calculated relative to a TNF $\alpha$ -treated control. **(B)** Determination of CaCO<sub>2</sub> cell viability using Alamar Blue fluorescence (resazurin assay) as a function of live cell number. Cells were seeded and treated as described in **(A)**. Next, the cells were incubated with Alamar Blue for 2 h. Relative fluorescence at the excitation/emission of 544/590 nm was measured. Values were calculated as percentage of live cells relative to the nontreated (cells without TNF $\alpha$  and treatments) control after reducing the autofluorescence of Alamar Blue without cells. Error bars indicate  $\pm$  SE ( $n = 3$ ). \*, \*\*, \*\*\* Indicate data statistically significantly different in comparison with the control (TNF $\alpha$ -treated cells) at  $p \leq 0.01$ ,  $p \leq 0.001$ ,  $p \leq 0.0001$ , respectively. Levels with different letters are significantly different from all combinations of pairs by Tukey's HSD.

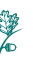

Supplement: Supp_Fig2.pdf [file Supp_Fig2.pdf]
