# Supplementary material
Source: PubMed Central journal article supplement (PMC5627671)

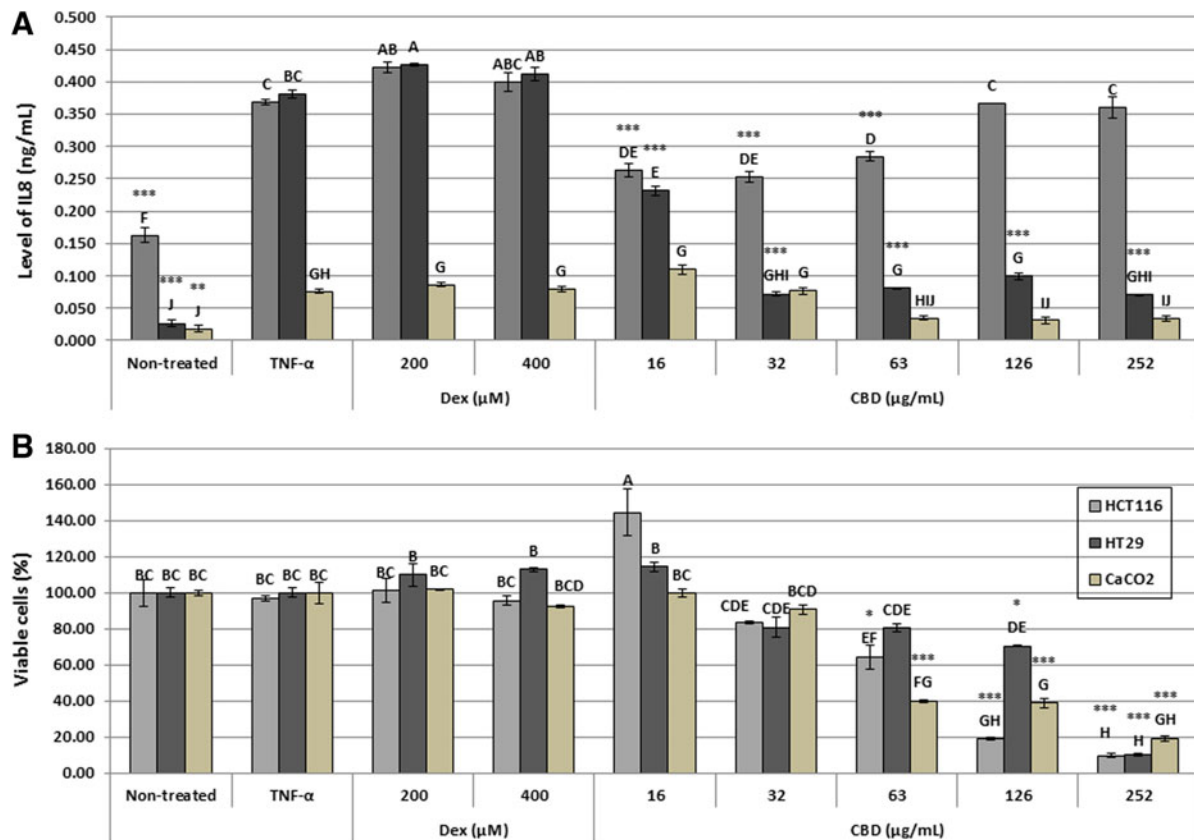

**SUPPLEMENTARY FIG. S3.** (A) Anti-inflammatory activity of CBD at different concentrations (16–252  $\mu\text{g/mL}$ ) and Dex (200 and 400  $\mu\text{M}$ ), measured as level of IL-8 on HCT116, HT29, or CaCO2 cells. HCT116, HT29, or CaCO2 cells were seeded (50,000 per well) in triplicate in 500  $\mu\text{L}$  growing media and incubated for 24 h at 37°C in a humidified 5%  $\text{CO}_2$ –95% air atmosphere. Cells were treated with 300 ng/mL TNF $\alpha$  and CBD and Dex for 4 h and IL-8 values were measured from the supernatant using a commercial kit. Values (ng/mL) were calculated relative to a TNF $\alpha$ -treated control. Nontreated are the cells without TNF $\alpha$  and treatments. (B) Determination of HCT116, HT29, and CaCO2 cell viability using Alamar Blue fluorescence (resazurin assay) as a function of live cell number. Cells were seeded and treated as described in (A). Next, the cells were incubated with Alamar Blue for 2 h. Relative fluorescence at the excitation/emission of 544/590 nm was measured. Values were calculated as percentage of live cells relative to the nontreated (cells without TNF $\alpha$  and treatments) control after reducing the autofluorescence of Alamar Blue without cells. Error bars indicate  $\pm$  SE ( $n=3$ ). \*, \*\*, \*\*\* Indicate data statistically significantly different in comparison with the control (TNF- $\alpha$ -treated cells) at  $p \leq 0.01$ ,  $p \leq 0.001$ ,  $p \leq 0.0001$ , respectively. Levels with different letters are significantly different from all combinations of pairs by Tukey's HSD. CBD, cannabidiol.

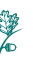

Supplement: Supp_Fig3.pdf [file Supp_Fig3.pdf]
